# Supplementary material for: The Causal Effect of Gut Microbiota and Plasma Metabolome on Lung Cancer and the Heterogeneity across Subtypes: A Mendelian Randomization Study
Source: MDPI journal article supplement (doi:10.3390/jpm14050453), 2024-04-25
Supplement: s1 [file s1]

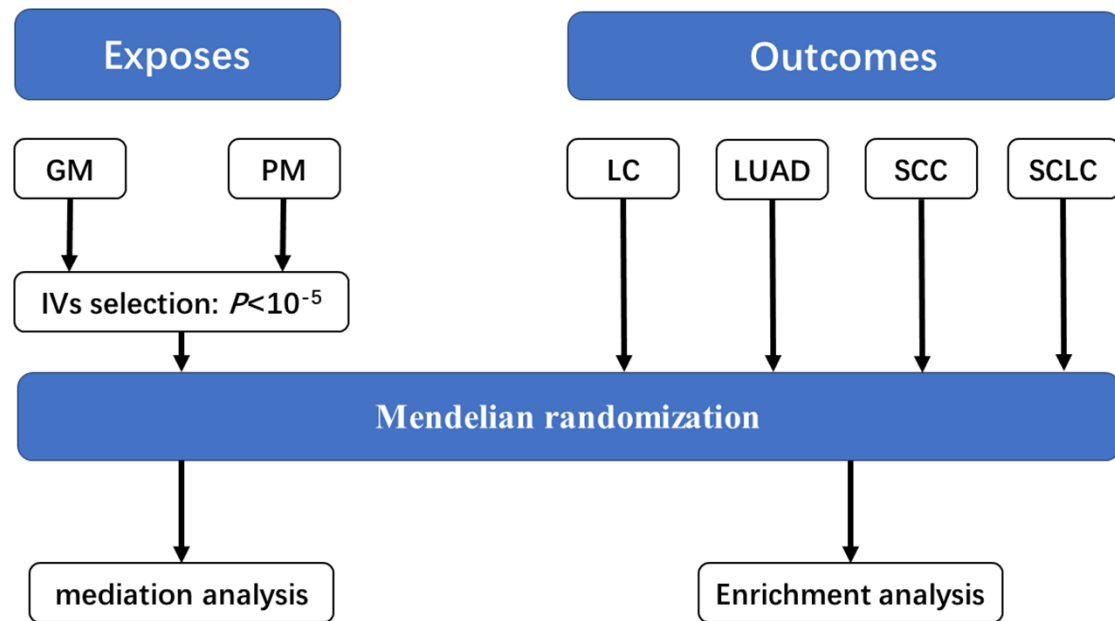

**Figure S1. Research flowchart.** Abbreviation: GM, Gut microbiota; PM, Plasma metabolome; IVs, Instrumental variables; LC, Lung cancer; LUAD, Lung adenocarcinoma; SCC, Squamous cell carcinoma; SCLC, Small cell lung cancer

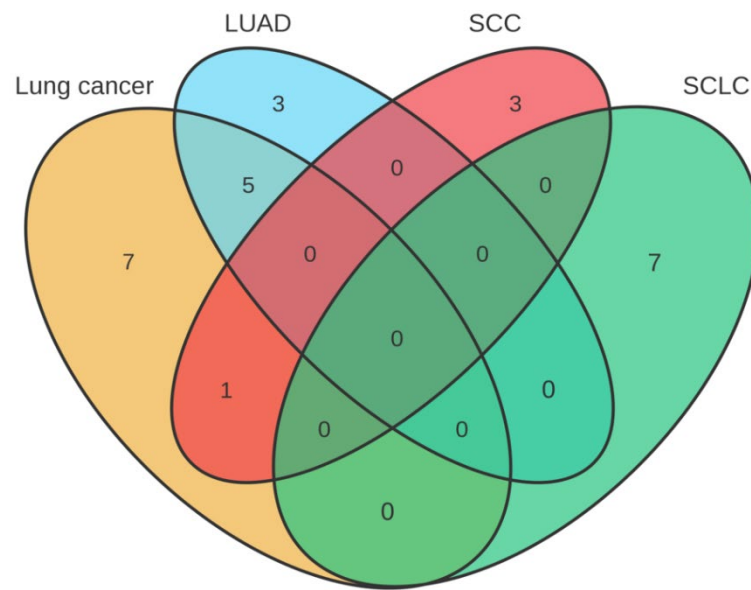

**Figure S2. The vein plot of gut microbiota shared by lung cancer, lung adenocarcinoma, squamous cell carcinoma, and small cell lung cancer.**  
**Abbreviation: LC, Lung cancer; LUAD, Lung adenocarcinoma; SCC, Squamous cell carcinoma; SCLC, Small cell lung cancer**

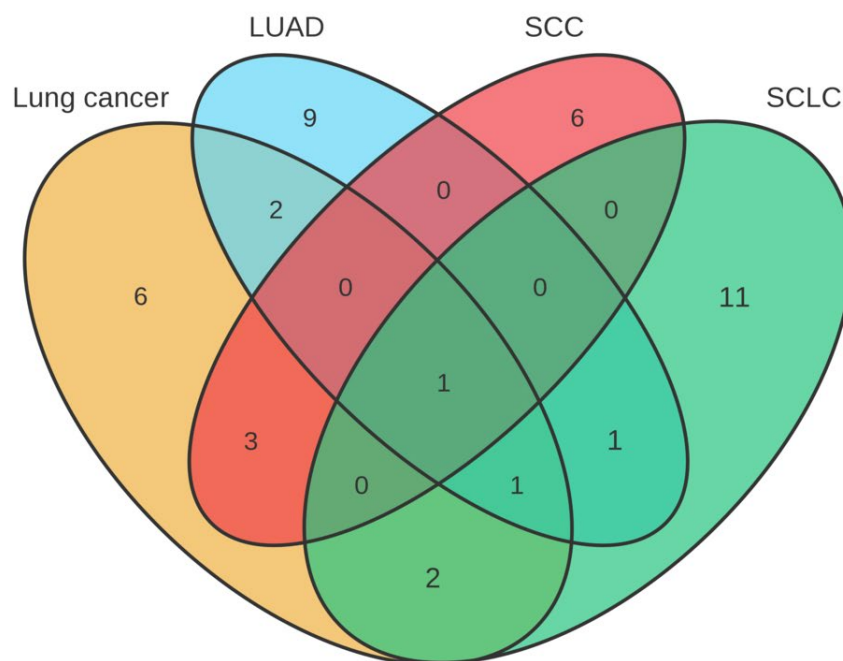

**Figure S3. The vein plot of plasma metabolome shared by lung cancer, lung adenocarcinoma, squamous cell carcinoma, and small cell lung cancer.**  
**Abbreviation: LC, Lung cancer; LUAD, Lung adenocarcinoma; SCC, Squamous cell carcinoma; SCLC, Small cell lung cancer**

Table S1. The detail of database included in this study

| Variable | First author          | Data ID    | Years | Case   | Contral | Population    |
|----------|-----------------------|------------|-------|--------|---------|---------------|
| LC       | McKay JD              | GCST004748 | 2017  | 29,266 | 56,450  | 100% European |
| LUAD     | McKay JD              | GCST004744 | 2017  | 11,273 | 55,483  | 100% European |
| SCC      | McKay JD              | GCST004750 | 2017  | 7,426  | 55,627  | 100% European |
| SCLC     | McKay JD              | GCST004746 | 2017  | 2664   | 21444   | 100% European |
| PM       | Shin                  | met-a-459  | 2014  | 7703   | -       | 100% European |
| GM       | Alexander Kurilshikov | MIbiogen   | 2021  | 18340  | -       | Mixed         |

Abbreviation: LC, lung cancer; LUAD, Lung adenocarcinoma; SCC, Squamous cell lung carcinoma; SCLC, Small cell lung cancer; PM, Plasma metabolites; GM, Gut microbiota
